# Supplementary material for: Anti-inflammatory, antioxidant and renoprotective effects of SOCS1 mimetic peptide in the BTBR ob/ob mouse model of type 2 diabetes
Source: PubMed Central journal article supplement — BMJ Open Diabetes Res Care. 2020 Sep 7;8(1):e001242. doi: 10.1136/bmjdrc-2020-001242 (PMC7478022; doi:10.1136/bmjdrc-2020-001242), 2020-09-07

**Supplementary Table 1: Assays and primers used for quantitative polymerase chain reaction (qPCR)**

| Gene           | Assay ID                   | Gene                     | Assay ID      |
|----------------|----------------------------|--------------------------|---------------|
| Ccl2 (Mcp-1)   | Mm00441242_m1              | Stat1                    | Mm01257286_m1 |
| Ccl5 (Rantes)  | Mm01302428_m1              | Stat3                    | Mm01219775_m1 |
| Cxcl10         | Mm00445235_m1              | Socs1                    | Mm00782550_s1 |
| Ifny           | Mm01168134_m1              | Socs3                    | Mm00545913_s1 |
| Tnf            | Mm00443258_m1              | Nfe2l2                   | Mm00477784_m1 |
| Il12           | Mm01288989_m1              | Hmox-1                   | Mm00516005_m1 |
| Havcr1 (Kim-1) | Mm00506686_m1              | Sod1                     | Mm01344233_g1 |
| Lcn2 (Ngal)    | Mm01324470_m1              | Catalase                 | Mm00437992_m1 |
| 18S            | 4310893E                   |                          |               |
| Gene           | Forward (5'-3')            | Reverse (5'-3')          |               |
| Nox1           | CCAACAGGCCATGGATGGAT       | CACTCCAGTAAGCCAGCAA      |               |
| Nox4 (Renox)   | CCCTCCTGGCTGCATTAGTC       | AACCCTCGAGGCAAAGATCC     |               |
| SR-A/Cd204     | TGAACGAGAGGATGCTGACTG      | GGAGGGGCCATTTTTAGTGC     |               |
| SR-B/Cd36      | GAACCACTGCTTTCAAAAAGTGG    | TGCTGTTCTTTGCCACGTCA     |               |
| Abca1          | AGTGATAATCAAAGTCAAAGGCACAC | AGCAACTTGGCACTAGTAACTCTG |               |
| Abcg1          | TTCATCGTCCTGGGCATCTT       | CGGATTTTGTATCTGAGGACGAA  |               |
| 18S            | CCGTCGTAGTTCCGACCATAA      | CAGCTTTGCAACCATACTCCC    |               |

**Abbreviations:** Ccl2. C-C Motif Chemokine Ligand 2; Ccl5. C-C Motif Chemokine Ligand 5; Cxcl10. C-X-C Motif Chemokine Ligand 10; Ifny. Interferon Gamma; Tnf. Tumoral Necrosis Factor; Il12. Interleukin 12; Kim-1. Kidney Injury Molecule-1; Lcn2. Lipocalin 2; Stat1. Signal Transducer and Activator of Transcription 1; Stat3. Signal Transducer and Activator of Transcription 3; Socs1. Suppressor of Cytokine Signaling 1; Socs3. Suppressor of Cytokine Signaling; Nfe2l2. Nuclear factor erythroid 2-related factor 2; Hmox-1. Heme-oxygenase 1; Sod1. Superoxide Dismutase 1; Catalase; 18S. 18 S ribosomal RNA; Nox1. NADPH Oxidase 1; Nox4. NADPH oxidase 4; SR-A/Cd204. Scavenger Receptor Class A/Cluster of Differentiation 204; SR-B/Cd36. Scavenger Receptor Class B/Cluster of Differentiation 36; Abca1. ATP Binding Cassette Subfamily A Member 1; Abcg1. ATP Binding Cassette Subfamily G Member 1.

**Supplementary Table 2: Metabolic parameters in BTBR mice and treatment with MiS1 peptide**

| Week | Mice Group | Body Weight  | Glycemia         | Creatinine   |
|------|------------|--------------|------------------|--------------|
| 4    | Wild type  | 14.3 ± 0.7   | 133 ± 12.3       | -            |
|      | ob/ob      | 17.6 ± 1.1*  | 145 ± 9.1        | -            |
| 6    | Wild type  | 24.9 ± 0.8   | 191 ± 4.8        | -            |
|      | ob/ob      | 38.3 ± 0.9** | 241.3 ± 17.6*    | -            |
| 12   | Wild type  | 34.3 ± 0.6   | 171 ± 6          | 0.44 ± 0.03  |
|      | ob/ob      | 60.1 ± 1.2** | 573.6 ± 14.4**** | 0.74 ± 0.1** |
|      | Veh        | 61.3 ± 1.9   | 596.4 ± 3.6      | 0.64 ± 0.1   |
|      | MiS1 2 µg  | 57.1 ± 2.0   | 595.9 ± 2.7      | 0.80 ± 0.03  |
|      | MiS1 4 µg  | 59.2 ± 0.7   | 597.3 ± 2.5      | 0.80 ± 0.1   |
|      | Mut 4 µg   | 63.1 ± 2.4   | 593.3 ± 6.7      | 0.63 ± 0.02  |

The data are expressed as mean ± SD in all groups (n = 5–8 mice/group). \*p<0.05; \*\*p<0.01; \*\*\*\*p<0.0001 vs. BTBR wild type.

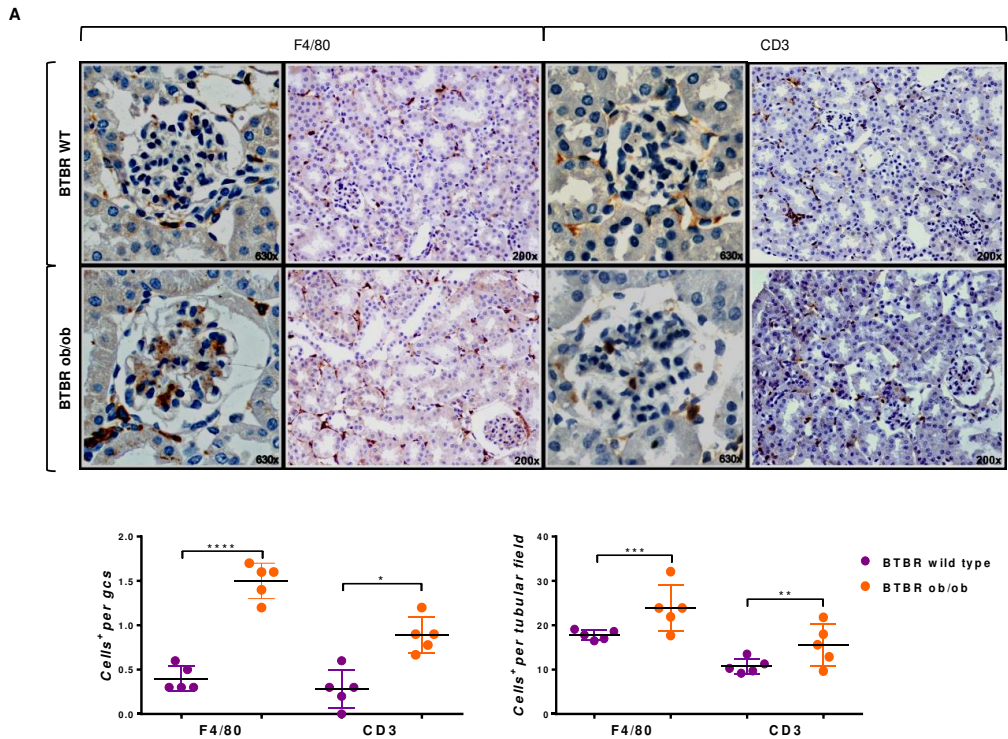

**Supplementary Figure 1: Presence of glomerular and interstitial inflammatory infiltrate in BTBR ob/ob mice.**

Inflammatory infiltrate was quantified by immunostaining of monocytes/macrophages (F4/80+) and T lymphocytes (CD3+) both at the glomerular and interstitial fields. **(A)** Representative images of F4/80 monocytes/macrophages and CD3 T lymphocytes in BTBR WT and BTBR ob/ob mice. Magnification 200x and 630x. Graphs represent the quantification of average number of cells F4/80+ and CD3+, both at the glomerular and interstitial fields. Data is shown as scatter dot plots and box with min/max values of each group (n = 5–6 mice/group). \*p<0.05; \*\*p<0.01; \*\*\*p<0.001 \*\*\*\*p<0.0001 vs. BTBR WT control.

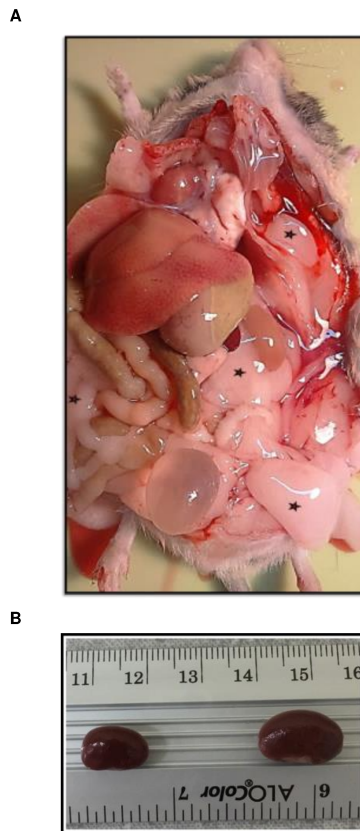

**Supplementary Figure 2: Distribution of visceral fatty tissue and renomegaly in BTBR ob/ob.**

(A) Photography showing the distribution of visceral fat observed in the BTBR ob/ob mouse of 12<sup>th</sup> weeks-old. (B) This photography shows the biometric analysis of the decapsulated kidneys of a BTBR wild type (left) and BTBR ob/ob (right) 12<sup>th</sup> week-old mouse. Together with the increase in renal weight (Figure 1B), the presence of renomegaly is evidenced.

### Supplementary Figure 3: Pleiotropic effects of Mimetic SOCS1 (MiS1) peptide in experimental T2D

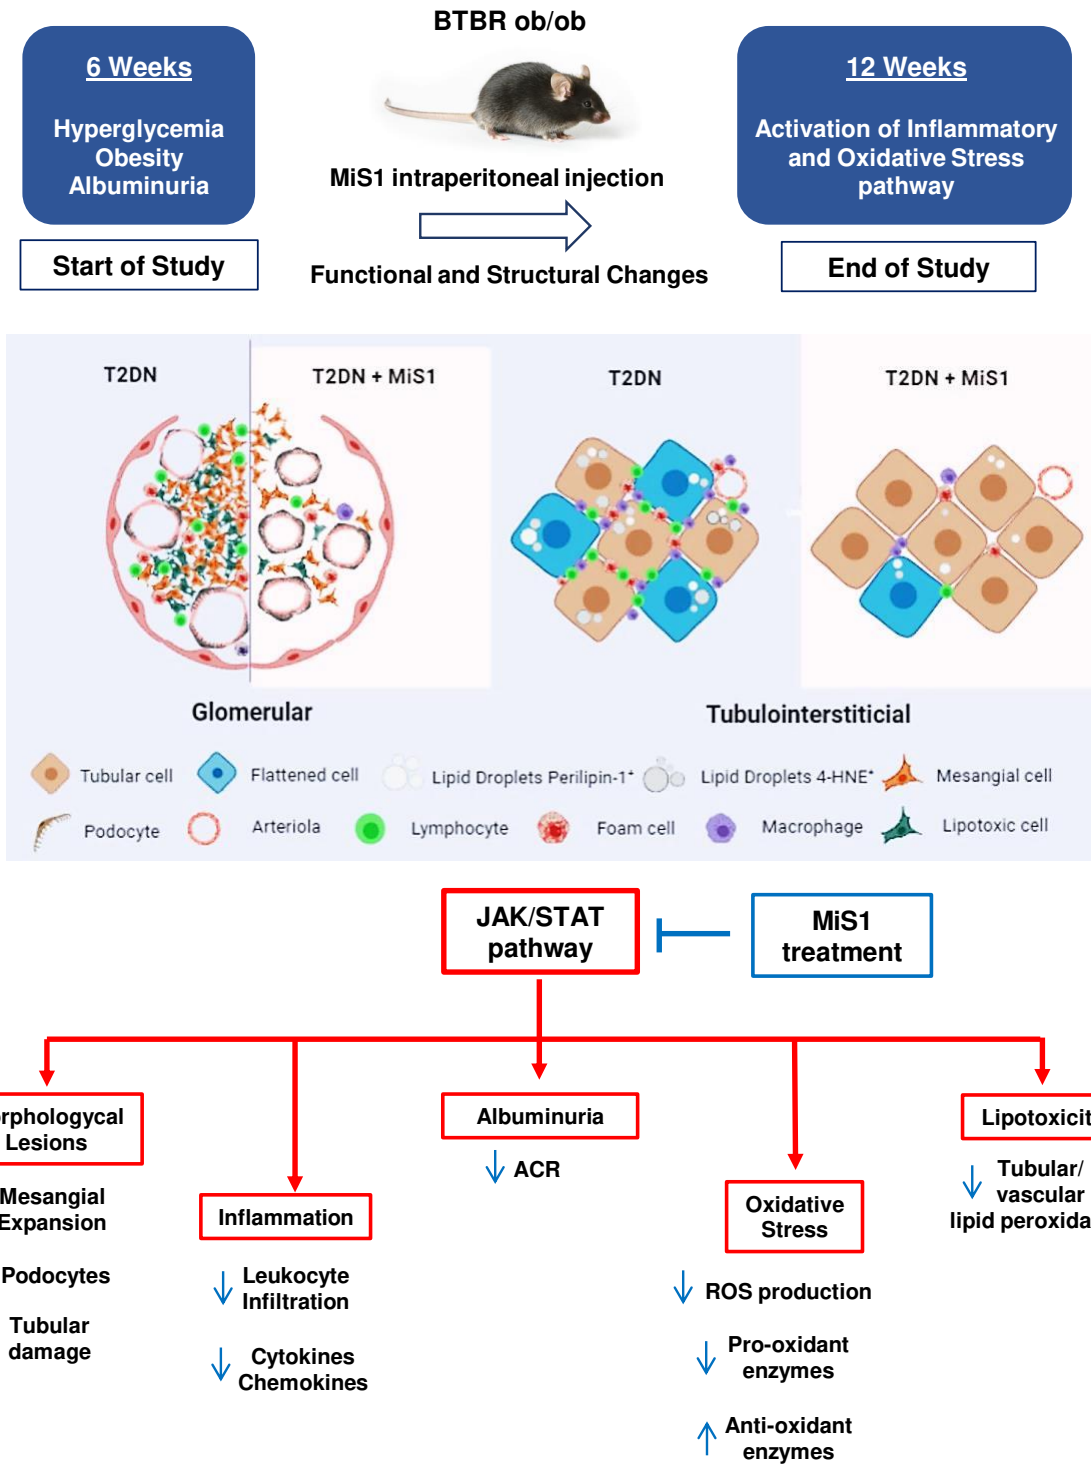

Supplement: bmjdrc-2020-001242supp001.pdf [file bmjdrc-2020-001242supp001.pdf]
